# Supplementary material
Source: PubMed Central journal article supplement (PMC3578954)
Supplement: supp_blood-2012-08-452284_blood-2012-08-452284-1.pdf [file supp_blood-2012-08-452284_blood-2012-08-452284-1.pdf]

**Supplementary Appendix**

**CCND2 rearrangements are the most frequent genetic events  
in Cyclin D1-negative mantle cell lymphoma**

*Salaverria et al.*

|             |                                      |           |
|-------------|--------------------------------------|-----------|
| <b>I.</b>   | <b>Supplemental Methods.....</b>     | <b>3</b>  |
| <b>II.</b>  | <b>Supplemental Tables .....</b>     | <b>6</b>  |
| <b>III.</b> | <b>Supplemental Figures .....</b>    | <b>22</b> |
| <b>IV.</b>  | <b>Supplemental References .....</b> | <b>26</b> |

## I. Supplemental Methods

### FISH analysis

For the detection of the t(11;14)(q13;q32) a LSI (Locus Specific Identifier) *IGH/CCND1* double-color, double-fusion probe was used (Abbott-Vysis, Downers Grove, IL). *IGH@* breaks were studied using *IGH* Dual Color, Break apart rearrangement Probe (Abbott-Vysis). For break-apart FISH assays of *CCND2*, *CCND3*, *IGK@*, and *IGL@*, appropriate BAC/PAC clones flanking the respective genes were selected using bioinformatic resources available at the University of California at Santa Cruz (<http://genome.ucsc.edu>). BAC/PAC clones were obtained from Invitrogen (Karlsruhe, Germany) and differentially labeled with Spectrum Orange or Spectrum Green (supplementary Table S2). Bacterial culture, BAC/PAC DNA isolation and labeling, probe preparation, and FISH were performed as previously described.<sup>1</sup>

### DNA extraction and array-comparative genomic hybridization (aCGH)

Genomic DNA was extracted from formalin-fixed, paraffin-embedded tissue (FFPE) blocks using the phenol-chloroform extraction method.<sup>2</sup> DNA quality control prior to hybridization was performed using standard protocols.<sup>3</sup> All extracted DNAs had at least a PCR control gene band of 200 bp (nine of the cases with a band of 200 bp, five cases with 400 bp, six cases with 300 bp and one cases with a 600 bp amplification band), and therefore all of them were suitable for hybridization. aCGH was performed in all samples hybridizing 1.5 µg of the test DNA and 1.5 µg of a sex-matched reference DNA on SurePrint G3 Human aCGH Microarray 1M (Agilent Technologies, Palo Alto, CA). The protocol Oligonucleotide Array-Based CGH for Genomic DNA Analysis (ULS

labeling for Blood, Cells, Tissues or FFPE) was used. aCGH hybridization was outsourced at qGenomics ([www.qgenomics.com/](http://www.qgenomics.com/)). Protocol Version 3.1 was followed with slight modifications. Briefly, after digestion the DNA was fragmented (99°C for 40 min) and labeled. After hybridization slides were washed and fluorescence was assessed using an Agilent microarray scanner G2565CA (Agilent Technologies). Raw data were generated from scanned images using Agilent Feature Extraction Software (v10.7). Log<sub>2</sub>ratios of background corrected values for tumor over normal DNA were calculated. Normalization was carried out on Agilent's CGH Analytics, integrated on the Genomic Workbench suite (v5.0). Detection of copy number alterations was performed using the Aberration Detection Method-2 (ADM-2) algorithm, implemented within the Agilent's genomics suite Genomic Workbench v5.0 and Nexus 6.0 Discovery Edition (Biodiscovery, El segundo, CA). The results were concordant with both algorithms. All alterations were confirmed by visual inspection of two different observers. Waves aCGH correction algorithm (WACA), based on GC content and fragment size adjusted was applied in several cases<sup>4</sup>. WACA efficiently removes the wave artifact, thereby greatly improving the accuracy of aCGH data analysis. Copy number variations/polymorphisms were identified and excluded from further analyses. Regions showing aberrant copy number changes were mapped according to the human reference sequence (NCBI36/hg18).

#### Cyclin D1, D2 and D3 and SOX11 gene expression assay

Total RNA was extracted from peripheral blood of three cases (ID17, ID36 and ID41) using the AllPrep DNA/RNA Mini Kit (Qiagen, Germantown, MA). The

potential residual DNA was removed using the TURBO DNA-free™ Kit from Ambion (Applied Biosystems, Santa Clara, US). Complementary DNA synthesis was carried out from 500 ng of total RNA and the product was amplified and quantified using TaqMan® Universal PCR Master Mix (Applied Biosystems) as previously described.<sup>5</sup> Cyclin D1, D2, D3 and E1 expression levels were evaluated using Gene Expression Assays-on-Demand Hs00765553\_m1, Hs00153380\_m1, Hs00236949\_m1, and Hs01026536\_m1, respectively (Applied Biosystems). Fluorescent probes TaqMan®MGB and primers were designed for evaluation of SOX11 expression using Primer Express® Version 2.0 (Applied Biosystems) probe: 5'-TTTTAACCACGGATAATTG-3', primer forward: 5'-CATGTAGACTAATGCAGCCATTGG-3', primer reverse: 5'-CACGGAGCACGTGTCAATTG-3'. We obtained an 87 bp amplicon for SOX11 that was suitable for FFPE material. The products were analyzed in a Step One Plus Real-Time PCR System (Applied Biosystems).

## II. Supplemental Tables

**Supplemental Table S1.** Genetical, morphological and immunophenotypical characteristics of 41 cyclin D1-negative lymphomas.

| Case | Transl. | LN Involvement | Growth pattern               | Morphology | Mitosis | SOX11        | CD5   | p27   | Ki67* | CD10 | CD23  |
|------|---------|----------------|------------------------------|------------|---------|--------------|-------|-------|-------|------|-------|
| ID1  | neg     | LN (inguinal)  | diffuse, monotonous          | classical  | 1.6/hpf | pos          | pos   | neg   | low   | -    | neg   |
| ID2  | neg     | LN (multiple)  | diffuse                      | classical  | 3.6/hpf | pos          | pos   | neg   | -     | -    | neg   |
| ID3  | neg     | LN             | nodular                      | classical  | 2.4/hpf | pos          | pos   | neg   | -     | -    | neg   |
| ID4  | neg     | LN (multiple)  | diffuse                      | classical  | 2.2/hpf | pos          | pos   | neg   | -     | -    | w/pos |
| ID5  | neg     | LN             | nodular                      | classical  | -       | pos          | pos   | neg   | -     | -    | neg   |
| ID6  | neg     | LN             | nodular                      | classical  | -       | pos          | pos   | neg   | -     | -    | neg   |
| ID7  | D2-K    | LN (inguinal)  | vaguely nodular, monotonous  | classical  | 1.6/hpf | pos          | pos   | neg   | -     | neg  | neg   |
| ID8  | neg     | no             | diffuse                      | classical  | 0.8/hpf | pos          | pos   | w/neg | low   | neg  | neg   |
| ID9  | neg     | LN             | diffuse                      | classical  | 0.2/hpf | pos          | pos   | w/neg | low   | neg  | neg   |
| ID10 | D2-K    | LN             | diffuse                      | classical  | 0.2/hpf | pos          | pos   | -     | low   | -    | -     |
| ID11 | neg     | LN (multiple)  | diffuse                      | classical  | 1.2/hpf | pos          | pos   | w     | low   | neg  | neg   |
| ID12 | neg     | LN (inguinal)  | vaguely nodular, diffuse     | classical  | 0.1/hpf | pos          | pos   | neg   | low   | neg  | neg   |
| ID13 | D2-K    | LN (multiple)  | nodular, diffuse, monotonous | classical  | 7/hpf   | pos          | pos   | w     | -     | neg  | neg   |
| ID14 | D2-H    | LN (multiple)  | diffuse                      | classical  | -       | pos          | pos   | neg   | -     | neg  | neg   |
| ID15 | D2-K    | LN (cervical)  | diffuse                      | classical  | -       | pos          | pos   | neg   | -     | neg  | neg   |
| ID16 | D2-?    | LN (multiple)  | diffuse                      | classical  | -       | pos          | pos   | neg   | -     | neg  | neg   |
| ID17 | D2-K    | LN (cervical)  | diffuse                      | classical  | -       | pos (RT-PCR) | pos   | -     | -     | neg  | neg   |
| ID18 | D2-K    | LN             | vaguely nodular diffuse      | classical  | 10/hpf  | pos          | pos   | -     | -     | neg  | -     |
| ID23 | neg     | LN             | diffuse                      | classical  | 10/hpf  | pos w        | w/neg | -     | -     | neg  | -     |
| ID24 | D2-H    | LN (cervical)  | nodular                      | blastoid   | 4/hpf   | pos          | pos   | -     | high  | -    | neg   |
| ID25 | neg     | LN (cervical)  | vaguely                      | classical  | 1/hpf   | pos          | pos   | w/neg | high  | neg  | neg   |

|              |              |                                    |                                                 |                                         |         |                      |       |       |      |                                |     |
|--------------|--------------|------------------------------------|-------------------------------------------------|-----------------------------------------|---------|----------------------|-------|-------|------|--------------------------------|-----|
| <b>ID26</b>  | neg          | LN (inguinal)                      | nodular<br>vaguely<br>nodular                   | classical                               | 8/hpf   | pos                  | pos   | pos   | high | neg                            | neg |
| <b>ID27</b>  | neg          | LN (inguinal)                      | nodular, GC<br>remnants,<br>DLBCL-like<br>areas | classical +<br>pleomorphic<br>component | 1.4/hpf | pos†                 | pos   | pos†  | low  | neg                            | neg |
| <b>ID28</b>  | D2-K         | LN (inguinal)                      | nodular                                         | classical                               | 2/hpf   | pos                  | pos   | w/neg | high | neg                            | neg |
| <b>ID29</b>  | D2-<br>break | LN (cervical)                      | Diffuse                                         | classical                               | 1.2/hpf | pos                  | pos   | w     | high | pos in a<br>subset<br>of cells | neg |
| <b>ID30</b>  | neg          | LN (axillary)                      | nodular                                         | classical                               | 6/hpf   | pos                  | pos   | -     | high | neg                            | neg |
| <b>ID31</b>  | D2-<br>break | LN<br>(periaortic)                 | nodular                                         | classical                               | 6/hpf   | pos                  | pos   | w/neg | high |                                | neg |
| <b>ID32</b>  | D2-K         | LN (axillary)                      | Diffuse                                         | classical                               | 3/hpf   | pos                  | pos   | neg   | high | neg                            | neg |
| <b>ID33</b>  | neg          | LN                                 | nodular                                         | classical                               | 0.2/hpf | pos                  | pos   | -     | -    | neg                            | neg |
| <b>ID34</b>  | D2-?         | LN                                 | nodular                                         | classical                               | 0.6/hpf | pos                  | pos   | neg   | low  | neg                            | neg |
| <b>ID35</b>  | D2-L         | LN (multiple)                      | Diffuse                                         | classical                               |         | pos                  | pos   | neg   | -    | -                              | -   |
| <b>ID36</b>  | D2-L         | LN (mutiple)                       | -                                               | -                                       | -       | pos (GEP,<br>RT-PCR) | pos   | -     | -    | -                              | neg |
| <b>ID37</b>  | D2-L         | LN (mutiple)                       | nodular                                         | classical                               | 0.4/hpf | pos                  | pos   | -     | low  | -                              | -   |
| <b>ID38</b>  | neg          | LN (mutiple)                       | nodular                                         | classical                               | 0.8/hpf | pos                  | pos   | w     | low  | neg                            | neg |
| <b>ID39</b>  | D2-L         | LN (cervical)                      | Diffuse                                         | classical                               | 1/hpf   | pos                  | pos   | w     | high | neg                            | neg |
| <b>ID40</b>  | D2-K         | LN (multiple)                      | Diffuse                                         | classical                               | 2.4/hpf | pos                  | pos   | neg   | low  | neg                            | neg |
| <b>ID42</b>  | D2-L         | LN (inguinal)                      | mantle zone                                     | classical                               | 0.2/hpf | pos                  | pos w | w     | low  | neg                            | neg |
| <b>ID43</b>  | D2-H         | LN<br>(mediastinal,<br>subcranial) | Diffuse                                         | classical                               | 1.2/hpf | pos                  | pos   | w     | low  | -                              | neg |
| <b>ID44</b>  | D2-K         | LN (inguinal)                      | nodular                                         | classical                               | 1.6/hpf | pos                  | pos   | neg   | low  | neg                            | neg |
| <b>ID45‡</b> | neg          | LN                                 | nodular                                         | classical                               | 1.2/hpf | neg                  | pos   | w     | low  | neg                            | neg |
| <b>ID46</b>  | neg          | -                                  | Diffuse                                         | classical                               | (high)  | pos                  | pos   | -     | low  | neg                            | -   |

D2-? indicates *CCND2* with unidentified partner discarding *IGH@*, *IGK@* or *IGL@*; D2-break, *CCND2* with unidentified partner; LN, lymph node; pos, positive; neg, negative; -, not available-not evaluable; w, weak; hpf: high power field; transl., translocation.

\*  $\geq 35\%$  Ki67 was considered high proliferation.

†negative in the large cell component.

‡This case was excluded due to its SOX11-negativity.

**Supplemental Table S2.** Probes used for fluorescence *in situ* hybridization (FISH) analysis.

| <b>Probe name</b>                     | <b>Company</b>     | <b>Chromosomal band</b>                | <b>Fluorescent dye</b>    |
|---------------------------------------|--------------------|----------------------------------------|---------------------------|
| LSI <i>IGH@</i> BAP                   | Abbott, IL         | <b>14q32</b>                           | Spectrum green/<br>orange |
| LSI <i>IGH/CCND1</i>                  | Abbott, IL         | <b>14q32/11q13</b>                     | Spectrum green/<br>orange |
| <b>Clone name</b>                     | <b>Vector type</b> | <b>Genomic localization of insert*</b> | <b>Fluorescent dye</b>    |
| <b><i>CCND2</i> BAP</b>               |                    | <b>12p13</b>                           |                           |
| RP11-578L13                           | BAC                | chr12:4,002,511-4,203,622              | Spectrum orange           |
| RP11-388F6                            | BAC                | chr12:4,443,393-4,613,592              | Spectrum green            |
| <b><i>CCND3</i> BAP</b>               |                    | <b>6p21</b>                            |                           |
| RP5-973N23                            | PAC                | 41,802,166-41,918,671                  | Spectrum green            |
| RP1-321B9                             | PAC                | 42,267,853-42,351,409                  | Spectrum orange           |
| RP1-139D8                             | PAC                | 42,100,870-42,267,952                  | Spectrum orange           |
| RP11-298J23                           | BAC                | 41,672,051-41,851,513                  | Spectrum green            |
| <b><i>IGK@</i> BAP</b>                |                    | <b>2p11</b>                            |                           |
| RP11-316G9<br>(AC009958)              | BAC                | chr2:89,561,552-89,772,752             | Spectrum orange           |
| RP11-1021F11                          | BAC                | chr2:88,767,510-88,939,350             | Spectrum green            |
| RP11-525L16<br>(AC104134)             | BAC                | chr2:88,570,647-88,680,773             | Spectrum green            |
| <b><i>IGL@</i> BAP</b>                |                    | <b>22q11</b>                           |                           |
| CTA-526G4<br>clone 60B5<br>(AC000102) | BAC                | chr22:20,634,858-20,740,796            | Spectrum green            |
| CTA-865E9                             | BAC                | chr22:21,835,020-21,838,494            | Spectrum orange           |
|                                       |                    | chr22:27,735,801-27,843,216            | Spectrum orange           |

BAC indicates bacteria artificial chromosome; BAP, break apart probe; LSI, Locus Specific Identifier; PAC, P1-derived artificial chromosome.

\*NCBI Build 36.1/hg18.



**Supplemental Table S3.** Primers used for mutational analysis of Cyclin D genes.

| <b>Primer</b>  | <b>Sequence</b>       | <b>Amplicon Length (bp)</b> |
|----------------|-----------------------|-----------------------------|
| <i>CCND1_F</i> | CAGCAGAACATGGACCC     |                             |
| <i>CCND1_R</i> | AGAATGAAGCTTTCCCTTCTG | 222                         |
| <i>CCND2_F</i> | GTGCTCCTCAATAGCCTG    |                             |
| <i>CCND2_R</i> | TCTCTTTCGGCCCAACTG    | 137                         |
| <i>CCND3_F</i> | CCTCTCAGACCAGCTCCA    |                             |
| <i>CCND3_R</i> | TAGATGTGGTGTGGTTCCT   | 194                         |

Bp indicates base pairs; F, forward; R, reverse.

**Supplemental Table S4.** Expression of cyclin D2, D3 and E in cyclin D1-negative MCL measured by IHC, RT-PCR and GEP.

| Case | Transl.  | cyclin D2 |      |     | cyclin D3 |      |     | cyclin E1 |      |
|------|----------|-----------|------|-----|-----------|------|-----|-----------|------|
|      |          | IHC       | qPCR | GEP | IHC       | qPCR | GEP | IHC       | qPCR |
| ID1  | neg      | pos       |      | pos |           |      |     |           |      |
| ID2  | neg      |           |      | pos |           |      |     |           |      |
| ID3  | neg      | na        |      |     | pos       |      | pos |           |      |
| ID4  | neg      | na        |      |     | pos       |      | pos |           |      |
| ID5  | neg      | na        |      |     | pos       |      | pos |           |      |
| ID8  | neg      | neg       |      |     | pos       |      |     |           |      |
| ID9  | neg      | na        | neg  |     | pos       | pos  |     |           | neg  |
| ID11 | neg      | pos w     | pos  |     | neg       |      |     |           |      |
| ID12 | neg      |           | pos  |     | neg       |      |     |           | neg  |
| ID23 | neg      |           |      |     |           |      |     | pos       |      |
| ID26 | neg      |           | neg  |     | neg       |      |     | pos w     | neg  |
| ID27 | neg      |           | neg  |     | neg       |      |     |           | neg  |
| ID30 | neg      |           |      |     |           |      |     |           |      |
| ID33 | neg      |           |      |     | pos       |      |     |           |      |
| ID38 | neg      |           |      |     |           |      |     |           |      |
| ID46 | neg      |           | pos  |     | neg       |      |     |           | neg  |
| ID7  | D2-K     | pos       |      |     | neg       |      |     |           |      |
| ID13 | D2-K     | pos       | pos  |     | neg       |      |     |           |      |
| ID14 | D2-H     |           | pos  |     | neg       |      |     |           |      |
| ID15 | D2-K     |           | pos  |     | neg       |      |     |           |      |
| ID16 | D2-?     |           | pos  |     | neg       |      |     |           |      |
| ID17 | D2-K     |           | pos  |     | neg       |      |     |           |      |
| ID18 | D2-K     | pos       |      |     |           |      |     |           |      |
| ID28 | D2-K     |           | pos  |     | neg       |      |     |           | neg  |
| ID29 | D2-break |           | pos  |     | neg       |      |     |           | neg  |
| ID31 | D2-break |           | pos  |     | neg       |      |     |           |      |
| ID34 | D2-?     | pos       | pos  |     | neg       |      |     |           | neg  |
| ID35 | D2-L     |           | pos  |     | neg       |      |     |           |      |
| ID36 | D2-L     |           |      | pos |           |      |     |           |      |
| ID39 | D2-L     |           | pos  |     | neg       |      |     |           | neg  |
| ID40 | D2-K     |           | pos  |     | neg       |      |     |           | neg  |

GEP indicates gene expression profiling; IHC, immunohistochemistry; pos, positive; qPCR, quantitative PCR; Transl., translocation; w, weak

**Supplemental Table S5.** Complete FISH results of 40 Cyclin D1-negative MCL.

| ID   | Transl. Status | CCND1 BAP | CCND2 BAP | CCND3 BAP | IGH@ BAP | IGK@ BAP | IGL@ BAP | IGH- CCND1 | IGH- CCND2 | IGK- CCND2 | IGL- CCND2 |
|------|----------------|-----------|-----------|-----------|----------|----------|----------|------------|------------|------------|------------|
| ID1  | neg            | neg       | neg       | neg       |          |          |          | neg        |            |            |            |
| ID2  | neg            | neg       | neg       | neg       |          |          |          | neg        |            |            |            |
| ID3  | neg            | neg       | neg       | neg       | neg*     |          |          | neg        |            |            |            |
| ID4  | neg            | neg       | neg       | neg       |          |          |          | neg        |            |            |            |
| ID5  | neg            | neg       | neg       | neg       |          |          |          | neg        |            |            |            |
| ID6  | neg            | neg       | neg       | neg       | neg*     | neg*     | neg*     | neg        |            |            |            |
| ID7  | D2-K           |           | pos*      |           | neg*     | pos*     | neg*     | neg        |            | pos*       |            |
| ID8  | neg            |           | neg       | neg       |          |          |          | neg        |            |            |            |
| ID9  | neg            |           | neg       | neg       |          |          |          | neg        |            |            |            |
| ID10 | D2-K           |           | pos       | neg       | neg*     | pos*     | neg*     | neg        |            |            |            |
| ID11 | neg            |           | neg       | neg       |          |          |          | neg        |            |            |            |
| ID12 | neg            |           | neg       | neg       |          |          |          | neg        |            |            |            |
| ID13 | D2-K           | neg       | pos       | neg       | neg      | pos      |          | neg        |            | pos        |            |
| ID14 | D2-H           | neg       | pos       |           | pos      |          |          |            | pos        |            |            |
| ID15 | D2-K           |           | pos       |           |          | pos      |          | neg        |            | pos        |            |
| ID16 | D2-?           | neg       | pos       |           | neg      | neg      |          | neg        |            |            |            |
| ID17 | D2-K           | neg       | pos       |           | neg      | pos      |          | neg        |            | pos        |            |
| ID18 | D2-K           | neg       | pos       | neg       | neg      | pos      | neg      |            |            | pos        |            |
| ID23 | neg            | neg       | neg       | neg       | pos      | neg      | neg      |            |            |            |            |
| ID24 | D2-H           |           | pos       | neg       | pos      | neg      | neg      | neg        | pos        |            |            |
| ID25 | neg            |           | neg       | neg       |          |          |          | neg        |            |            |            |
| ID26 | neg            |           | neg       | neg       |          |          |          | neg        |            |            |            |
| ID27 | neg            |           | neg       | neg       |          |          |          | neg        |            |            |            |
| ID28 | D2-K           |           | pos       |           | neg      | pos      | neg      | neg        |            | pos        |            |
| ID29 | D2 break       |           | pos       |           | neg.     | neg      | neg      | neg        |            |            |            |
| ID30 | neg            | neg       | neg       | na        |          |          |          | neg        |            |            |            |
| ID31 | D2-break       |           | pos       | neg       | neg      | neg      | neg      | neg        |            |            |            |
| ID32 | D2-K           |           | pos       |           |          | pos      |          | neg        |            |            |            |
| ID33 | neg            |           | neg       | neg       |          |          |          | neg        |            |            |            |
| ID34 | D2-?           |           | pos       | neg       |          |          |          | neg        |            |            |            |
| ID35 | D2-L           | neg       | pos       |           | neg      | neg      | pos      |            |            |            | pos        |
| ID36 | D2-L           |           | pos       |           | neg      | neg      | pos      | neg        |            |            | pos        |
| ID37 | D2-L           | neg       | pos       |           | neg      | neg      | pos      | neg        |            |            |            |
| ID38 | neg            |           | neg       | neg       |          |          |          |            |            |            |            |
| ID39 | D2-L           |           | pos       |           | neg      | neg      | pos      | neg        |            |            | pos        |
| ID40 | D2-K           |           | pos       |           | neg      | pos      | neg      | neg        |            | pos        |            |
| ID42 | D2-L           |           | pos       |           |          |          |          | neg        | neg        | neg        | pos        |
| ID43 | D2-H           |           | pos       |           |          |          |          | neg        | pos        | neg        |            |
| ID44 | D2-K           |           | pos       |           |          |          |          | neg        | neg        | pos        |            |
| ID46 | neg            |           | neg       | neg       |          |          |          | neg        |            |            |            |

BAP indicates break apart probe; D2-?, CCND2 break with unidentified partner discarding IGH@, IGK@, IGL@; D2-break, CCND2 break with unidentified partner; neg, negative, pos: positive; transl, translocation.

\*New FISH data of previously published cases.

**Supplemental Table S6.** Molecular data of 40 Cyclin D1-negative MCL.

| <b>Case</b> | <b>Transl. Status</b> | <b>CN array</b>      | <b>No. CNA</b> | <b>9p21/<br/>CDKN2A</b> | <b>11q23/<br/>ATM</b> | <b>17p13/<br/>TP53</b> | <b>TP53 status</b>            | <b>CCND1 mut</b> | <b>CCND2 mut</b> | <b>CCND3 mut</b> |
|-------------|-----------------------|----------------------|----------------|-------------------------|-----------------------|------------------------|-------------------------------|------------------|------------------|------------------|
| ID1         | neg                   | Affymetrix 500K /CGH | 7              | del                     | CNN-LOH               | wt                     |                               |                  |                  |                  |
| ID2         | neg                   | Affymetrix 500K /CGH | 2              | del                     | wt                    | wt                     |                               | wt               | wt               | wt               |
| ID3         | neg                   | Affymetrix 500K /CGH | 27             | del                     | del                   | wt                     |                               | wt               | wt               | wt               |
| ID4         | neg                   | Affymetrix 500K /CGH | 9              | homo del                | del                   | wt                     |                               | wt               | wt               | wt               |
| ID5         | neg                   | Affymetrix 500K /CGH | 10             | wt                      | del                   | wt                     |                               | wt               | wt               | wt               |
| ID6         | neg                   | Affymetrix 500K /CGH | 7              | wt                      | del                   | wt                     |                               | wt               | wt               | wt               |
| ID7         | D2-K                  | na                   | na             | na                      | na                    | na                     |                               |                  |                  |                  |
| ID8         | neg                   | Agilent 1M*          | 3              | wt                      | del                   | wt                     |                               | wt               | wt               | wt               |
| ID9         | neg                   | Agilent 1M*          | 7              | wt                      | wt                    | wt                     |                               | wt               | wt               | wt               |
| ID10        | D2-K                  | na                   | na             | na                      | na                    | na                     |                               |                  |                  |                  |
| ID11        | neg                   | na                   | na             | na                      | na                    | na                     |                               |                  |                  |                  |
| ID12        | neg                   | Agilent 1M*          | 4              | wt                      | del                   | wt                     |                               | wt               | wt               | wt               |
| ID13        | D2-K                  | Agilent 1M*          | 8              | homo del                | wt                    | wt                     |                               |                  |                  |                  |
| ID14        | D2 -H                 | Agilent 1M*          | 12             | wt                      | del                   | del                    | na                            |                  |                  |                  |
| ID15        | D2-K                  | Agilent 1M*          | 17             | del                     | wt                    | wt                     |                               |                  |                  |                  |
| ID16        | D2-?                  | Agilent 1M*          | 10             | del                     | wt                    | wt                     |                               |                  |                  |                  |
| ID17        | D2-K                  | Agilent 1M*          | 2              | wt                      | wt                    | wt                     |                               |                  |                  |                  |
| ID18        | D2-K                  | Agilent 1M*          | 8              | del                     | wt                    | del                    | exon 8<br>c.818G>A<br>p.R273H |                  |                  |                  |
| ID23        | neg                   | Agilent 1M*          | 16             | homo del                | wt                    | wt                     |                               |                  |                  |                  |
| ID24        | D2-H                  | na                   | na             | na                      | na                    | na                     |                               |                  |                  |                  |
| ID25        | neg                   | Agilent 1M           | 15             | wt                      | wt                    | wt                     |                               | wt               | wt               | wt               |
| ID26        | neg                   | Agilent 1M           | 18             | homo del                | wt                    | wt                     |                               | wt               | wt               | wt               |
| ID27        | neg                   | Agilent 1M           | 7              | wt                      | del                   | wt                     |                               | wt               | wt               | wt               |
| ID28        | D2-K                  | Agilent 1M           | 9              | wt                      | wt                    | wt                     |                               |                  |                  |                  |
| ID29        | D2-neg                | Agilent 1M           | 10             | wt                      | gain                  | wt                     |                               |                  |                  |                  |
| ID30        | neg                   | Agilent 1M           | 30             | homo del                | del                   | wt                     |                               |                  | wt               | wt               |
| ID31        | D2-neg                | Agilent 1M           | 30             | del                     | wt                    | wt                     |                               |                  |                  |                  |
| ID32        | D2-K                  | Agilent 1M           | 6              | wt                      | del                   | del                    | na                            |                  |                  |                  |

|      |      |            |    |          |     |                |                                   |
|------|------|------------|----|----------|-----|----------------|-----------------------------------|
| ID33 | neg  | na         | na | na       | na  | na             |                                   |
| ID34 | D2-? | Agilent 1M | 3  | wt       | wt  | del            | wt                                |
| ID35 | D2-L | Agilent 1M | 14 | wt       | wt  | Small homo del | homo del (promoter-exon 1)        |
| ID36 | D2-L | Agilent 1M | 7  | homo del | wt  | wt             |                                   |
| ID37 | D2-L | Agilent 1M | 6  | wt       | wt  | wt             |                                   |
| ID38 | neg  | Agilent 1M | 14 | wt       | wt  | del            | wt exon 7 and 10. Others na       |
| ID39 | D2-L | Agilent 1M | 13 | homo del | wt  | wt             |                                   |
| ID40 | D2-K | Agilent 1M | 6  | del      | wt  | del            | exon 7<br>c.723delC<br>p.S241fs*5 |
| ID42 | D2-L | Agilent 1M | 5  | wt       | del | wt             |                                   |
| ID43 | D2-H | na         | na | na       | na  | na             |                                   |
| ID44 | D2-K | na         | na | na       | na  | na             |                                   |
| ID46 | neg  | na         | na | na       | na  | na             |                                   |

CN indicates copy number; CNN-LOH, copy number neutral-loss of heterozygosity; D2-?, *CCND2* break with unidentified partner discarding *IGH@*, *IGK@* and *IGL@* genes; D2-break, *CCND2* break with unidentified partner; del, deletion; homo del, homozygous deletion; mut, mutation; na, not available; neg, negative; transl., translocation; wt, wild type (no deletion/no CNN-LOH or no mutation).

\*New copy number data of previously published cases.

**Supplemental Table S7.** Copy number alterations of 32 Cyclin D1-negative MCL.

| Chromosome Region            | Event    | Length (bp) | Cytoband      |
|------------------------------|----------|-------------|---------------|
| <b>ID1</b>                   |          |             |               |
| chr1:51,993,505-120,217,562  | loss     | 68224057    | p32.3-p12     |
| chr1:120,233,802-145,938,656 | loss     | 25704854    | p12-q21.1     |
| chr1:148,815,736-150,433,200 | loss     | 1617464     | q21.2-q21.3   |
| chr1:152,683,489-164,496,493 | loss     | 11813004    | q21.3-q24.1   |
| chr1:178,210,240-182,622,710 | loss     | 4412470     | q25.2-q25.3   |
| chr8:180,568-38,755,604      | loss     | 38575036    | p23.3-p11.23  |
| chr9:30,910-35,589,966       | loss     | 35559056    | p24.3-p13.3   |
| <b>ID2</b>                   |          |             |               |
| chr9:0-140,273,252           | loss     | 140273252   | p24.3-q34.3   |
| chr13:16,000,001-114,142,980 | loss     | 98142979    | q11 - q34     |
| <b>ID3</b>                   |          |             |               |
| chr1:92833128-108105451      | loss     | 15272323    | p22.1-p13.3   |
| chr3:122157217-143336624     | gain     | 21179407    | q13.33-q23    |
| chr3:143391891-155982031     | loss     | 12590140    | q23-q25.2     |
| chr3:155991502-199322068     | gain     | 43330566    | q25.2-q29     |
| chr4:19099-1869140           | loss     | 1850041     | p16.3         |
| chr6:99676430-107549664      | loss     | 7873234     | q16.2-q21     |
| chr6:114619068-124346399     | loss     | 9727331     | q22.1-q22.31  |
| chr8:180568-4155262          | loss     | 3974694     | p23.3-p23.2   |
| chr8:4164397-12517929        | loss     | 8353532     | p23.2-p23.1   |
| chr8:12632654-39663381       | loss     | 27030727    | p23.1-p11.22  |
| chr8:39928509-41380701       | loss     | 1452192     | p11.21        |
| chr8:41481725-47059642       | loss     | 5577917     | p11.21-q11.1  |
| chr8:47064078-47847875       | gain     | 783797      | q11.1         |
| chr8:47851472-49520992       | loss     | 1669520     | q11.1-q11.21  |
| chr8:49687681-49820725       | loss     | 133044      | q11.21        |
| chr8:49838874-77957795       | gain     | 28118921    | q11.21-q21.11 |
| chr8:78051789-85298711       | gain     | 7246922     | q21.11-q21.2  |
| chr8:85305933-87855113       | loss     | 2549180     | q21.2-q21.3   |
| chr8:87858448-146264218      | gain     | 58405770    | q21.3-q24.3   |
| chr9:3697057-3763822         | loss     | 66765       | p24.2         |
| chr9:4272942-97248353        | loss     | 92975411    | p24.2-q22.32  |
| chr9:98238862-109511513      | loss     | 11272651    | q22.33-q31.2  |
| chr9:110631769-110750958     | loss     | 119189      | q31.3         |
| chr11:95814925-116253431     | loss     | 20438506    | q21.3-q23.3   |
| chr13:16,000,001-114,142,980 | loss     | 98142979    | q11 - q34     |
| chr22:15405346-17348025      | gain     | 1942679     | q11.1-q22.1   |
| chr22:21967766-49519949      | loss     | 27552183    | q11.23-q13.33 |
| <b>ID4</b>                   |          |             |               |
| chr3:107,270,190-199322,068  | gain     | 92051878    | q13.11-q29    |
| chr4:53,377,961-96,814,371   | loss     | 43436410    | q12-q22.3     |
| chr9:21,757,404-22,231,938   | homo del | 474534      | p21.3         |
| chr11:84,251,805-114,988,378 | loss     | 30736573    | q14.1-q23.2   |
| chr13:85,305,104-114,092,980 | loss     | 28787876    | q31.1-q34     |
| chr14:19,865,555-45,099,437  | loss     | 25233882    | q11.2-q21.3   |
| chr15:53,360,818-86,623,678  | gain     | 33262860    | q21.3-q25.3   |
| chr15:86,625,685-100,210,760 | loss     | 13585075    | q25.3-q26.3   |
| chr17:51,265,658-78,605,474  | gain     | 27339816    | q22-q25.3     |
| <b>ID5</b>                   |          |             |               |
| chr1:73,687,779-89,945,089   | loss     | 16257310    | p31.1-p22.2   |
| chr1:92,498,763-106,592,214  | loss     | 14093451    | p22.1-p21.1   |

|                               |           |           |                 |
|-------------------------------|-----------|-----------|-----------------|
| chr1:107,364,675-112,046,454  | loss      | 4681779   | p13.3-p13.2     |
| chr1:149,495,781-178,520,303  | loss      | 29024522  | q21.2-q25.2     |
| chr3:41,866-47,887,707        | loss      | 47845841  | p26.3-p21.31    |
| chr3:70,451,282-75,779,859    | loss      | 5328577   | p14.1-p12.3     |
| chr3:75,879,418-79,985,503    | loss      | 4106085   | p12.3           |
| chr11:99,008,430-116,960,909  | loss      | 17952479  | q22.1-q23.3     |
| chr12:36,144,018-43,299,888   | loss      | 7155870   | q11-q12         |
| chr20:17,408-28,143,658       | loss      | 28126250  | p13-q11.1       |
| <b>ID6</b>                    |           |           |                 |
| chr3:135,289,282-199,322,068  | gain      | 64032786  | q22.1-q29       |
| chr4:112,976,431-191,306,043  | gain      | 78329612  | q25-q35.2       |
| chr11:93,480,063-113,841,400  | loss      | 20361337  | q21-q23.2       |
| chr13:49,167,094-50,232,139   | loss      | 1065045   | q14.3           |
| chr13:85,422,217-108,460,875  | gain      | 23038658  | q31.1-q33.3     |
| chr13:108,469,059-114,092,980 | loss      | 5623921   | q33.3-q34       |
| chr18:61,496,779-76,115,554   | gain      | 14618775  | q22.1-q23       |
| <b>ID8</b>                    |           |           |                 |
| chr1:68,813,528-118,010,981   | loss      | 49197454  | p31.2 - p12     |
| chr11:102,431,516-116,476,458 | loss      | 14044943  | q22.3 - q23.3   |
| chr12:10,972,665-14,943,904   | loss      | 3971240   | p13.2 - p12.3   |
| <b>ID9</b>                    |           |           |                 |
| chr1:73,978,016-121,233,935   | loss      | 47255920  | p31.1 - p11.1   |
| chr1:152,015,948-170,010,522  | loss      | 17994575  | q21.3 - q24.3   |
| chr1:174,539,409-176,471,597  | loss      | 1932189   | q25.2           |
| chr12:12,774,282-15,124,635   | loss      | 2350354   | p13.1 - p12.3   |
| chr13:17,920,058-114,142,980  | loss      | 96222923  | q11 - q34       |
| chr18:86,595-14,980,964       | loss      | 14894370  | p11.32 - p11.21 |
| chr18:49,103,401-76,117,153   | gain      | 27013753  | q21.2 - q23     |
| <b>ID12</b>                   |           |           |                 |
| chr1:89,671,879-119,855,488   | loss      | 30183609  | p22.2 - p12     |
| chr7:136,173-80,019,908       | gain      | 79883735  | p22.3 - q21.11  |
| chr7:135,249,024-158,767,981  | gain      | 23518957  | q33 - q36.3     |
| chr11:79,476,627-114,249,985  | loss      | 34773358  | q14.1 - q23.2   |
| <b>ID13</b>                   |           |           |                 |
| chr1:74,410,664-79,209,473    | loss      | 4798810   | p31.1           |
| chr3:119,704,364-165,177,987  | gain      | 45473624  | q13.32 - q26.1  |
| chr3:165,223,275-199,501,827  | high gain | 34278553  | q26.1 - q29     |
| chr3:29,751,203-34,407,204    | gain      | 4656002   | p24.1 - p22.3   |
| chr6:91,289,881-170,899,992   | loss      | 79610112  | q15 - q27       |
| chr9:21,073,742-22,513,201    | homo del  | 1439460   | p21.3           |
| chr13:38,594,462-57,403,763   | loss      | 18809302  | q13.3 - q21.1   |
| chr13:82,780,288-88,825,160   | loss      | 6044873   | q31.1 - q31.3   |
| <b>ID14</b>                   |           |           |                 |
| chr1:233,483,703-247,249,719  | loss      | 13766017  | q42.3 - q44     |
| chr3:146,954,760-199,274,862  | gain      | 52320103  | q24 - q29       |
| chr3:68,259,584-82,217,903    | loss      | 13958320  | p14.1 - p12.2   |
| chr7:180,684-43,725,580       | high gain | 43544897  | p22.3 - p13     |
| chr7:43,725,580-158,640,740   | gain      | 114915161 | p13 - q36.3     |
| chr8:71,679,759-141,964,056   | gain      | 70284298  | q13.3 - q24.3   |
| chr11:78,806,216-117,595,915  | loss      | 38789700  | q14.1 - q23.3   |
| chr15:76,070,289-100,293,722  | loss      | 24223434  | q24.3 - q26.3   |
| chr17:89,619-3,405,506        | loss      | 3315888   | p13.3           |
| chr18:12,141,770-75,884,693   | gain      | 63742924  | p11.21 - q23    |
| chr18:86,595-12,123,324       | loss      | 12036730  | p11.32 - p11.21 |

|                               |           |           |                 |
|-------------------------------|-----------|-----------|-----------------|
| chrX:176,239-154,737,515      | gain      | 154561277 | p22.33 - q28    |
| <b>ID15</b>                   |           |           |                 |
| chr3:103,031,571-199,159,185  | gain      | 96127615  | q12.3 - q29     |
| chr4:82,277,484-87,121,650    | loss      | 4844167   | q21.21 - q21.3  |
| chr4:98,786,025-116,258,391   | gain      | 17472367  | q22.3 - q26     |
| chr4:117,753,722-120,119,804  | loss      | 2366083   | q26             |
| chr6:337,275-25,928,580       | gain      | 25591306  | p25.3 - p22.2   |
| chr6:85,014,643-170,899,992   | loss      | 85885350  | q14.3 - q27     |
| chr8:116,154,526-138,120,712  | gain      | 21966187  | q23.3 - q24.23  |
| chr8:138,182,510-146,084,009  | high gain | 7901500   | q24.23 - q24.3  |
| chr9:21,779,871-23,781,282    | loss      | 2001412   | p21.3           |
| chr9:134,894,698-140,273,252  | gain      | 5378555   | q34.13 - q34.3  |
| chr11:59,501,681-71,585,570   | gain      | 12083890  | q12.1 - q13.4   |
| chr12:49,085,265-132,198,966  | gain      | 83113702  | q13.13 - q24.33 |
| chr13:37,528,238-74,926,621   | loss      | 37398384  | q13.3 - q22.2   |
| chr13:100,433,003-114,142,980 | loss      | 13709978  | q32.3 - q34     |
| chr15:49,779,890-100,338,915  | gain      | 50559026  | q21.2 - q26.3   |
| chr19:72,596-63,739,055       | gain      | 63666460  | p13.3 - q13.43  |
| chr22:15,489,707-49,634,900   | gain      | 34145194  | q11.1 - q13.33  |
| <b>ID16</b>                   |           |           |                 |
| chr2:230,745,327-231,313,360  | loss      | 568034    | q37.1           |
| chr3:62,244,056-84,397,240    | loss      | 22153185  | p14.2 - p12.1   |
| chr3:128,142,008-199,067,780  | gain      | 70925773  | q21.3 - q29     |
| chr8:114,816,427-146,054,649  | gain      | 31238223  | q23.3 - q24.3   |
| chr9:20,094,175-33,737,685    | loss      | 13643511  | p21.3 - p13.3   |
| chr10:122,294,405-129,001,459 | loss      | 6707055   | q26.12 - q26.2  |
| chr10:129,937,783-132,104,961 | loss      | 2167179   | q26.2 - q26.3   |
| chr13:99,532,408-114,142,980  | loss      | 14610573  | q32.3 - q34     |
| chr15:32,530,368-100,131,521  | gain      | 67601154  | q14 - q26.3     |
| chr22:22,900,000-30,774,569   | loss      | 7874570   | q11.23 - q12.3  |
| <b>ID17</b>                   |           |           |                 |
| chr3:226,965-199,274,862      | gain      | 199047898 | p26.3 - q29     |
| chr21:14,152,725-46,890,916   | gain      | 32738192  | q11.2 - q22.3   |
| <b>ID18</b>                   |           |           |                 |
| chr1:234,554,474-237,835,442  | loss      | 3280969   | q42.3 - q43     |
| chr2:134,331,342-146,899,054  | loss      | 12567713  | q21.2 - q22.3   |
| chr3:0-199,501,827            | gain      | 199501828 | p26.3 - q29     |
| chr6:194,425-26,682,076       | gain      | 26487652  | p25.3 - p22.1   |
| chr9:20,608,317-32,351,699    | loss      | 11743383  | p21.3 - p21.1   |
| chr15:38,792,251-48,275,906   | loss      | 9483656   | q15.1 - q21.2   |
| chr17:0-22,135,792            | loss      | 22135793  | p13.3 - p11.1   |
| chr19:0-63,811,651            | loss      | 63811652  | p13.3 - q13.43  |
| <b>ID23</b>                   |           |           |                 |
| chr2:37,857,137-39,765,052    | loss      | 1907916   | p22.2 - p22.1   |
| chr4:87,021,902-191,055,460   | gain      | 104033559 | q21.23 - q35.2  |
| chr6:100,519,055-106,968,270  | loss      | 6449216   | q16.3 - q21     |
| chr6:108,842,051-109,945,426  | loss      | 1103376   | q21             |
| chr6:133,291,911-145,951,050  | loss      | 12659140  | q23.2 - q24.3   |
| chr9:5,787,087-6,815,923      | loss      | 1028837   | p24.1           |
| chr9:21,785,243-22,035,541    | homo del  | 250299    | p21.3           |
| chr9:22,035,541-27,748,165    | loss      | 5712625   | p21.3 - p21.2   |
| chr9:34,850,892-38,751,707    | loss      | 3900816   | p13.3 - p13.1   |
| chr10:87,680,312-88,090,573   | loss      | 410262    | q23.1 - q23.2   |
| chr10:89,654,536-90,171,763   | loss      | 517228    | q23.31          |



|                             |      |          |                |
|-----------------------------|------|----------|----------------|
| chr13:37,055,769-61,845,186 | loss | 24789418 | q13.3 - q21.31 |
| chr15:22,657,953-46,785,947 | loss | 24127995 | q11.2 - q21.1  |
| chr16:74,038-31,910,354     | gain | 31836317 | p13.3 - p11.2  |
| chr18:16,798,083-76,117,153 | gain | 59319071 | q11.1 - q23    |
| chr21:12,860,650-46,944,323 | gain | 34083674 | q11.1 - q22.3  |

#### ID25

|                               |           |          |                |
|-------------------------------|-----------|----------|----------------|
| chr3:0-27,689,673             | loss      | 27689674 | p26.3 - p24.1  |
| chr3:27,703,100-31,603,069    | gain      | 3899970  | p24.1 - p23    |
| chr3:31,606,294-35,729,732    | high gain | 4123439  | p23 - p22.3    |
| chr3:35,733,527-51,846,193    | gain      | 16112667 | p22.3 - p21.1  |
| chr3:75,958,756-84,186,801    | gain      | 8228046  | p12.3 - p12.1  |
| chr3:124,837,607-199,501,827  | gain      | 74664221 | q21.1 - q29    |
| chr5:49,580,889-72,351,948    | gain      | 22771060 | q11.1 - q13.2  |
| chr5:72,396,367-118,201,085   | loss      | 45804719 | q13.2 - q23.1  |
| chr8:0-75,198,612             | loss      | 75198613 | p23.3 - q21.11 |
| chr10:123,084,428-135,374,737 | loss      | 12290310 | q26.12 - q26.3 |
| chr13:45,086,087-114,142,980  | loss      | 69056894 | q14.12 - q34   |
| chr14:17,546,581-106,368,585  | loss      | 88822005 | q11.1 - q32.33 |
| chr18:50,362,627-76,080,308   | gain      | 25717682 | q21.2 - q23    |
| chr19:72,596-24,174,380       | loss      | 24101785 | p13.3 - p12    |
| chr22:15,150,516-49,691,432   | loss      | 34540917 | q11.1 - q13.33 |

#### ID26

|                              |          |           |                 |
|------------------------------|----------|-----------|-----------------|
| chr1:143,432,108-247,249,719 | gain     | 103817612 | q21.1 - q44     |
| chr4:142,330,704-191,273,063 | loss     | 48942360  | q31.21 - q35.2  |
| chr6:0-33,088,385            | gain     | 33088386  | p25.3 - p21.32  |
| chr6:105,229,233-170,899,992 | loss     | 65670760  | q21 - q27       |
| chr7:0-30,339,319            | gain     | 30339320  | p22.3 - p15.1   |
| chr9:0-21,959,807            | loss     | 21959808  | p24.3 - p21.3   |
| chr9:21,959,807-22,027,830   | homo del | 68024     | p21.3           |
| chr9:22,027,830-30,700,306   | loss     | 8672477   | p21.3 - p21.1   |
| chr10:27,967,434-38,665,781  | loss     | 10698348  | p12.1 - p11.21  |
| chr11:57,402,170-63,452,380  | loss     | 6050211   | q12.1 - q13.1   |
| chr12:17,029,319-132,349,534 | gain     | 115320216 | p12.3 - q24.33  |
| chr13:21,363,962-57,006,562  | loss     | 35642601  | q12.11 - q21.1  |
| chr17:49,101,131-78,774,742  | gain     | 29673612  | q22 - q25.3     |
| chr18:0-56,546,645           | gain     | 56546646  | p11.32 - q21.32 |
| chr18:61,526,155-76,117,153  | loss     | 14590999  | q22.1 - q23     |
| chr21:14,152,725-46,944,323  | gain     | 32791599  | q11.2 - q22.3   |
| chrX:0-10,750,556            | loss     | 10750557  | p22.33 - p22.2  |
| chrX:78,161,130-154,913,754  | gain     | 76752625  | q21.1 - q28     |

#### ID27

|                              |      |          |               |
|------------------------------|------|----------|---------------|
| chr1:80,619,100-85,090,543   | loss | 4471444  | p31.1 - p22.3 |
| chr1:99,871,298-109,071,469  | loss | 9200172  | p21.2 - p13.3 |
| chr2:167,393,190-170,790,488 | loss | 3397299  | q24.3 - q31.1 |
| chr8:57,195,231-69,304,008   | loss | 12108778 | q12.1 - q13.2 |
| chr8:115,177,456-146,274,826 | gain | 31097371 | q23.3 - q24.3 |
| chr11:75,473,101-117,610,184 | loss | 42137084 | q13.5 - q23.3 |
| chr18:48,394,049-76,117,153  | gain | 27723105 | q21.2 - q23   |

#### ID28

|                              |      |          |                |
|------------------------------|------|----------|----------------|
| chr1:59,457,106-110,871,182  | loss | 51414077 | p32.1 - p13.3  |
| chr3:47,829,355-68,228,276   | gain | 20398922 | p21.31 - p14.1 |
| chr13:94,004,590-114,142,980 | loss | 20138391 | q32.1 - q34    |
| chr15:38,765,310-42,992,281  | loss | 4226972  | q15.1 - q21.1  |
| chr15:43,020,462-100,338,915 | gain | 57318454 | q21.1 - q26.3  |

|                               |           |           |                  |
|-------------------------------|-----------|-----------|------------------|
| chr18:47,954,940-76,117,153   | high gain | 28162214  | q21.2 - q23      |
| chr19:0-7,912,935             | loss      | 7912936   | p13.3 - p13.2    |
| chrY:2,563,305-18,074,587     | gain      | 15511283  | p11.31 - q11.221 |
| chrY:19,257,651-27,210,470    | loss      | 7952820   | q11.22 - q12     |
| <b>ID29</b>                   |           |           |                  |
| chr1:5,731,947-9,577,458      | loss      | 3845512   | p36.31 - p36.22  |
| chr3:148,977,817-199,501,827  | gain      | 50524011  | q24 - q29        |
| chr6:92,147,279-127,338,511   | loss      | 35191233  | q16.1 - q22.33   |
| chr11:58,583,917-77,398,073   | gain      | 18814157  | q12.1 - q14.1    |
| chr11:98,046,539-134,452,384  | gain      | 36405846  | q22.1 - q25      |
| chr13:51,221,123-68,670,806   | loss      | 17449684  | q14.3 - q21.33   |
| chr13:68,682,477-100,508,153  | gain      | 31825677  | q21.33 - q33.1   |
| chr13:100,508,171-114,127,451 | loss      | 13619281  | q33.1 - q34      |
| chr19:0-19,818,636            | gain      | 19818637  | p13.3 - p12      |
| chr19:40,062,439-55,007,746   | gain      | 14945308  | q13.11 - q13.33  |
| <b>ID30</b>                   |           |           |                  |
| chr1:33,485,277-34,856,481    | loss      | 1371205   | p35.1 - p34.3    |
| chr1:37,950,366-40,203,347    | loss      | 2252982   | p34.3 - p34.2    |
| chr1:40,762,476-42,278,709    | loss      | 1516234   | p34.2            |
| chr1:43,708,473-46,315,579    | loss      | 2607107   | p34.2 - p34.1    |
| chr1:5,714,458-6,789,871      | loss      | 1075414   | p36.31           |
| chr1:51,495,144-53,559,489    | loss      | 2064346   | p32.3            |
| chr1:66,938,205-74,368,743    | loss      | 7430539   | p31.3 - p31.1    |
| chr1:77,599,391-85,721,054    | loss      | 8121664   | p31.1 - p22.3    |
| chr1:86,226,477-86,936,769    | loss      | 710293    | p22.3            |
| chr1:92,007,479-121,052,453   | loss      | 29044975  | p22.1 - p11.2    |
| chr1:143,597,231-159,736,731  | loss      | 16139501  | q21.1 - q23.3    |
| chr1:161,239,479-175,980,553  | loss      | 14741075  | q23.3 - q25.2    |
| chr1:182,837,574-185,658,629  | loss      | 2821056   | q25.3 - q31.1    |
| chr1:235,994,921-237,567,794  | loss      | 1572874   | q43              |
| chr2:33,314,713-44,243,800    | loss      | 10929088  | p22.3 - p21      |
| chr2:47,539,929-148,147,686   | loss      | 100607758 | p21 - q22.3      |
| chr3:31,760-12,545,019        | loss      | 12513260  | p26.3 - p25.1    |
| chr6:105,758,502-170,899,992  | loss      | 65141491  | q21 - q27        |
| chr7:105,253,295-129,532,052  | loss      | 24278758  | q22.2 - q32.2    |
| chr9:21,917,964-32,189,162    | homo del  | 10271199  | p21.3 - p21.1    |
| chr9:3,538,540-21,878,969     | loss      | 18340430  | p24.2 - p21.3    |
| chr9:32,189,162-39,146,954    | loss      | 6957793   | p21.1 - p13.1    |
| chr10:58,968,027-60,093,859   | loss      | 1125833   | q21.1            |
| chr11:106,731,698-114,299,361 | loss      | 7567664   | q22.3 - q23.2    |
| chr11:123,309,407-126,282,577 | loss      | 2973171   | q24.1 - q24.2    |
| chr11:78,627,253-79,720,573   | loss      | 1093321   | q14.1            |
| chr11:80,163,644-82,876,083   | loss      | 2712440   | q14.1            |
| chr11:95,266,025-95,876,733   | loss      | 610709    | q21              |
| chr12:9,867,619-16,404,236    | loss      | 6536618   | p13.31 - p12.3   |
| chr13:18,194,544-114,142,980  | loss      | 95948437  | q11 - q34        |
| <b>ID31</b>                   |           |           |                  |
| chr2:6,819-576,621            | loss      | 569802    | p25.3            |
| chr2:795,628-65,054,286       | gain      | 64258658  | p25.3 - p14      |
| chr2:65,087,982-69,651,854    | loss      | 4563872   | p14              |
| chr3:68,749-10,115,254        | loss      | 10046505  | p26.3 - p25.3    |
| chr3:10,307,233-17,419,855    | gain      | 7112622   | p25.3 - p24.3    |
| chr3:17,421,189-58,556,421    | loss      | 66373407  | p24.3 - p14.2    |
| chr3:58,556,422-59,636,927    | gain      | 1080505   | p14.2            |

|                              |          |          |                |
|------------------------------|----------|----------|----------------|
| chr3:59,636,928-83,794,596   | loss     | 24157668 | p14.2-p12.1    |
| chr4:95,351,472-97,821,365   | loss     | 2469893  | q22.2 - q22.3  |
| chr4:97,908,661-149,148,031  | gain     | 51239370 | q22.3 - q31.23 |
| chr4:172,766,175-183,888,171 | loss     | 11121996 | q34.1 - q35.1  |
| chr4:183,897,426-190,286,409 | gain     | 6388983  | q35.1 - q35.2  |
| chr6:44,345,592-137,291,465  | loss     | 92945873 | p21.1 - q23.3  |
| chr6:137,291,466-138,816,901 | gain     | 1525435  | q23.3          |
| chr6:138,816,902-156,192,098 | loss     | 17375196 | q23.3-q25.3    |
| chr6:156,192,099-158,435,910 | gain     | 2243811  | q25.3          |
| chr6:158,435,911-170,701,979 | loss     | 12266068 | q25.3-q27      |
| chr7:136173-52685750         | gain     | 52549577 | p22.3 - p12.1  |
| chr9:6591209-44199601        | loss     | 37608392 | p24.1 - p11.2  |
| chr9:85112843-90024559       | loss     | 4911716  | q21.32 - q22.1 |
| chr10:126161-2749287         | loss     | 2623126  | p15.3          |
| chr10:2766712-38476892       | gain     | 35710180 | p15.3 - p11.21 |
| chr10:42882274-60893302      | loss     | 18011028 | q11.21 - q21.1 |
| chr10:107640100-112960080    | loss     | 5319980  | q25.1 - q25.2  |
| chr10:126429421-135285845    | loss     | 8856424  | q26.13 - q26.3 |
| chr13:18361437-114105156     | loss     | 95743719 | q11 - q34      |
| chr13:49162155-50902584      | homo del | 1740429  | q14.3          |
| chr16:58424523-88827254      | gain     | 30402731 | q21-qter       |
| chr18:37290171-76116226      | gain     | 38826055 | q12.3 - q23    |
| chr19:3329679-5377839        | loss     | 2048160  | p13.3          |

#### ID32

|                              |      |          |                 |
|------------------------------|------|----------|-----------------|
| chr1:2,891,601-7,282,760     | loss | 4391160  | p36.32 - p36.23 |
| chr3:64,657,420-82,604,850   | loss | 17947431 | p14.1 - p12.2   |
| chr3:127,905,418-199,419,815 | gain | 71514398 | q21.3 - q29     |
| chr11:88,279,111-115,999,479 | loss | 27720369 | q14.3 - q23.3   |
| chr17:0-15,862,491           | loss | 15862492 | p13.3 - p12     |
| chr18:46,495,596-76,117,153  | gain | 29621558 | q21.2 - q23     |

#### ID34

|                              |      |          |               |
|------------------------------|------|----------|---------------|
| chr3:137,317,818-199,430,186 | gain | 62112369 | q22.2 - q29   |
| chr13:18,049,914-114,013,125 | loss | 95963212 | q11 - q34     |
| chr17:0-37,460,571           | loss | 37460572 | p13.3 - q21.2 |

#### ID35

|                              |          |           |                 |
|------------------------------|----------|-----------|-----------------|
| chr3:120,717,330-199,501,827 | gain     | 78784498  | q13.33 - q29    |
| chr6:0-100,323,545           | gain     | 100323546 | p25.3 - q16.3   |
| chr6:100,327,723-170,899,992 | loss     | 70572270  | q16.3 - q27     |
| chr9:70,154,146-75,911,108   | loss     | 5756963   | q13 - q21.13    |
| chr10:0-12,378,074           | loss     | 12378075  | p15.3 - p13     |
| chr13:44,766,611-67,847,797  | loss     | 23081187  | q14.12 - q21.33 |
| chr13:90,509,280-114,142,980 | loss     | 23633701  | q31.3 - q34     |
| chr15:46,415,909-100,338,915 | gain     | 53923007  | q21.1 - q26.3   |
| chr16:45,058,242-63,073,190  | loss     | 18014949  | q11.2 - q21     |
| chr17:4,925,707-7,447,513    | loss     | 2521807   | p13.2 - p13.1   |
| chr17:7,447,513-7,515,707    | homo del | 68195     | p13.1           |
| chr17:7,515,707-22,200,000   | loss     | 14684294  | p13.1 - q11.1   |
| chr17:35,614,061-37,604,226  | loss     | 1990166   | q21.2           |
| chr18:22,373,429-76,117,153  | gain     | 53743725  | q11.2 - q23     |

#### ID36

|                              |          |          |                |
|------------------------------|----------|----------|----------------|
| chr8:0-39,450,836            | loss     | 39450837 | p23.3 - p11.23 |
| chr8:129,357,472-140,613,631 | gain     | 11256160 | q24.21 - q24.3 |
| chr9:134,764,651-140,273,252 | loss     | 5508602  | q34.13 - q34.3 |
| chr9:21,203,515-22,082,128   | homo del | 878614   | p21.3          |

|                              |                  |           |                |
|------------------------------|------------------|-----------|----------------|
| chr10:0-1,457,845            | loss             | 1457846   | p15.3          |
| chr11:0-4,331,622            | loss             | 4331623   | p15.5 - p15.4  |
| chr19:0-19,818,636           | loss             | 19818637  | p13.3 - p12    |
| <b>ID37</b>                  |                  |           |                |
| chr1:0-55,413,191            | loss             | 55413192  | p36.33 - p32.3 |
| chr5:205,754-44,031,380      | gain             | 43825627  | p15.33 - p12   |
| chr7:6,685,316-53,482,527    | gain             | 46797212  | p22.1 - p12.1  |
| chr13:95,209,783-114,142,980 | loss             | 18933198  | q32.1 - q34    |
| chr14:59,600,968-93,854,901  | loss             | 34253934  | q23.1 - q32.13 |
| chr19:0-63,811,651           | loss             | 63811652  | p13.3 - q13.43 |
| <b>ID38</b>                  |                  |           |                |
| chr4:20,287,021-35,043,814   | loss             | 14756793  | p15.31 - p15.1 |
| chr7:0-158,821,317           | gain             | 158821318 | pter-qter      |
| chr8:0-146,264,902           | gain             | 146264903 | pter-qter      |
| chr12:33654-33968005         | gain             | 33934351  | p13.33 - p11.1 |
| chr13:43415370-114115907     | loss             | 70700537  | q14.11 - q34   |
| chr16:37,360-2,068,695       | loss             | 2031335   | p13.3          |
| chr16:2,191,556-4,325,681    | gain             | 2134125   | p13.3          |
| chr16:5,731,466-5,771,994    | loss             | 40528     | p13.3          |
| chr16:5,791,237-664,4817     | gain             | 853580    | p13.3 - p13.2  |
| chr16:6,660,422-8,066,557    | loss             | 1406135   | p13.2          |
| chr16:8,090,486-16,169,516   | gain             | 8079030   | p13.2 - p13.11 |
| chr17:48,658-38,550,415      | loss             | 38501757  | p13.3-q21.31   |
| chr17:36,381,308-78,653,589  | gain             | 42272281  | q21.2-qter     |
| chr18:32,868,064-76,116,226  | gain             | 43248162  | q12.2 - q23    |
| <b>ID39</b>                  |                  |           |                |
| chr3:0-26,997,021            | loss             | 26997022  | p26.3 - p24.1  |
| chr3:27,004,907-45,264,320   | high gain        | 18259414  | p24.1 - p21.31 |
| chr3:59,801,661-76,296,630   | loss             | 16494970  | p14.2 - p12.3  |
| chr3:88,780,987-90,391,757   | loss             | 1610771   | p11.2 - p11.1  |
| chr3:101,938,062-103,852,930 | gain             | 1914869   | q12.2 - q12.3  |
| chr6:105,736,247-144,652,990 | loss             | 38916744  | q21 - q24.2    |
| chr9:1,471,834-2,400,093     | loss             | 928260    | p24.3 - p24.2  |
| chr9:14,666,611-17,621,523   | loss             | 2954913   | p22.3 - p22.2  |
| chr9:21,203,515-22,408,114   | homo del         | 1204600   | p21.3          |
| chr9:22,408,114-24,561,146   | loss             | 2153033   | p21.3          |
| chr9:33,977,890-37,590,163   | loss             | 3612274   | p13.3 - p13.2  |
| chr9:88,325,406-89,792,312   | loss             | 1466907   | q21.33 - q22.1 |
| chr13:97,113,864-114,142,980 | loss             | 17029117  | q32.2 - q34    |
| <b>ID40</b>                  |                  |           |                |
| chr3:122,031,782-199,501,827 | gain             | 77470046  | q13.33 - q29   |
| chr8:122,476,421-146,274,826 | gain             | 23798406  | q24.12 - q24.3 |
| chr9:0-140,273,252           | loss             | 140273253 | p24.3 - q34.3  |
| chr13:28,720,872-114,142,980 | loss             | 85422109  | q12.3 - q34    |
| chr15:18,378,345-38,012,353  | loss             | 19634009  | q11.1 - q15.1  |
| chr17:0-22,135,792           | loss             | 22135793  | p13.3 - p11.1  |
| <b>ID42</b>                  |                  |           |                |
| chr11:93,107,599-113,904,326 | loss             | 20796728  | q21 - q23.2    |
| chr13:18,309,625-46,228,556  | loss (subclonal) | 27918932  | q11 - q14.2    |
| chr13:46,589,758-114,142,980 | loss             | 67553223  | q14.2 - q34    |
| chr14:18,635,679-106,368,585 | loss (subclonal) | 87732907  | q11.1 - q32.33 |
| chr22:14,867,857-49,691,432  | loss (subclonal) | 34823576  | q11.1 - q13.33 |

Bp indicates base pairs; del: deletion; homo del, homozygous deletion.

**Supplemental Table S8.** Chromosomal regions (>5Mb) characteristic of cyclin D1 positive- and -negative MCL.

| <b>Cyclin D1-negative vs. Cyclin D1-positive MCL</b> |                  |                  |
|------------------------------------------------------|------------------|------------------|
| <b>Region</b>                                        | <b>Size (Mb)</b> | <b>Chr. Band</b> |
| <b>Frequent Deletions</b>                            |                  |                  |
| chr10:126429421-132104961                            | 5,68             | 10q26.13-q26.3   |
| chr13:100433003-114142980                            | 13,71            | 13q32.3-q34      |
| chr19:4368845-17399478                               | 13,03            | 19p13.3-p13.11   |
| <b>Frequent Gains</b>                                |                  |                  |
| chr3:27703100-36473790                               | 8,77             | 3p24.1-p22.3     |
| chr4:110232094-125093640                             | 14,86            | 4q25-q28.1       |
| chr4:143344366-149148031                             | 5,80             | 4q31.21-q31.23   |
| chr6:5869499-26682076                                | 20,81            | 6p25.1-p22.1     |
| chr18:46495596-76117153                              | 29,62            | 18q21.2-q23      |
| <b>CyclinD1-positive vs. Cyclin D1-negative</b>      |                  |                  |
| <b>Region</b>                                        | <b>Size (Mb)</b> | <b>Chr. Band</b> |
| <b>Frequent Deletions</b>                            |                  |                  |
| chr1:55413191-103469102                              | 48,06            | 1p32.3-p21.1     |
| chr9:78852665-98238862                               | 19,39            | 9q21.13-q22.33   |

Chr, indicates chromosome; Mb, megabases.

### III. Supplemental Figures

**Supplemental Figure S1. Cyclin D1, D2, D3 and E1 expression analyzed by qPCR in lymphoid neoplasms. (A)** Box plot representing cyclin D2 expression and **(B)** bar plot with cyclin D1, D2, D3 and E1 expression analyzed in cyclin D1-negative MCL with presence/absence of *CCND2* rearrangements, in MCL cyclin D1-positive and in other lymphoid neoplasms non-MCL.

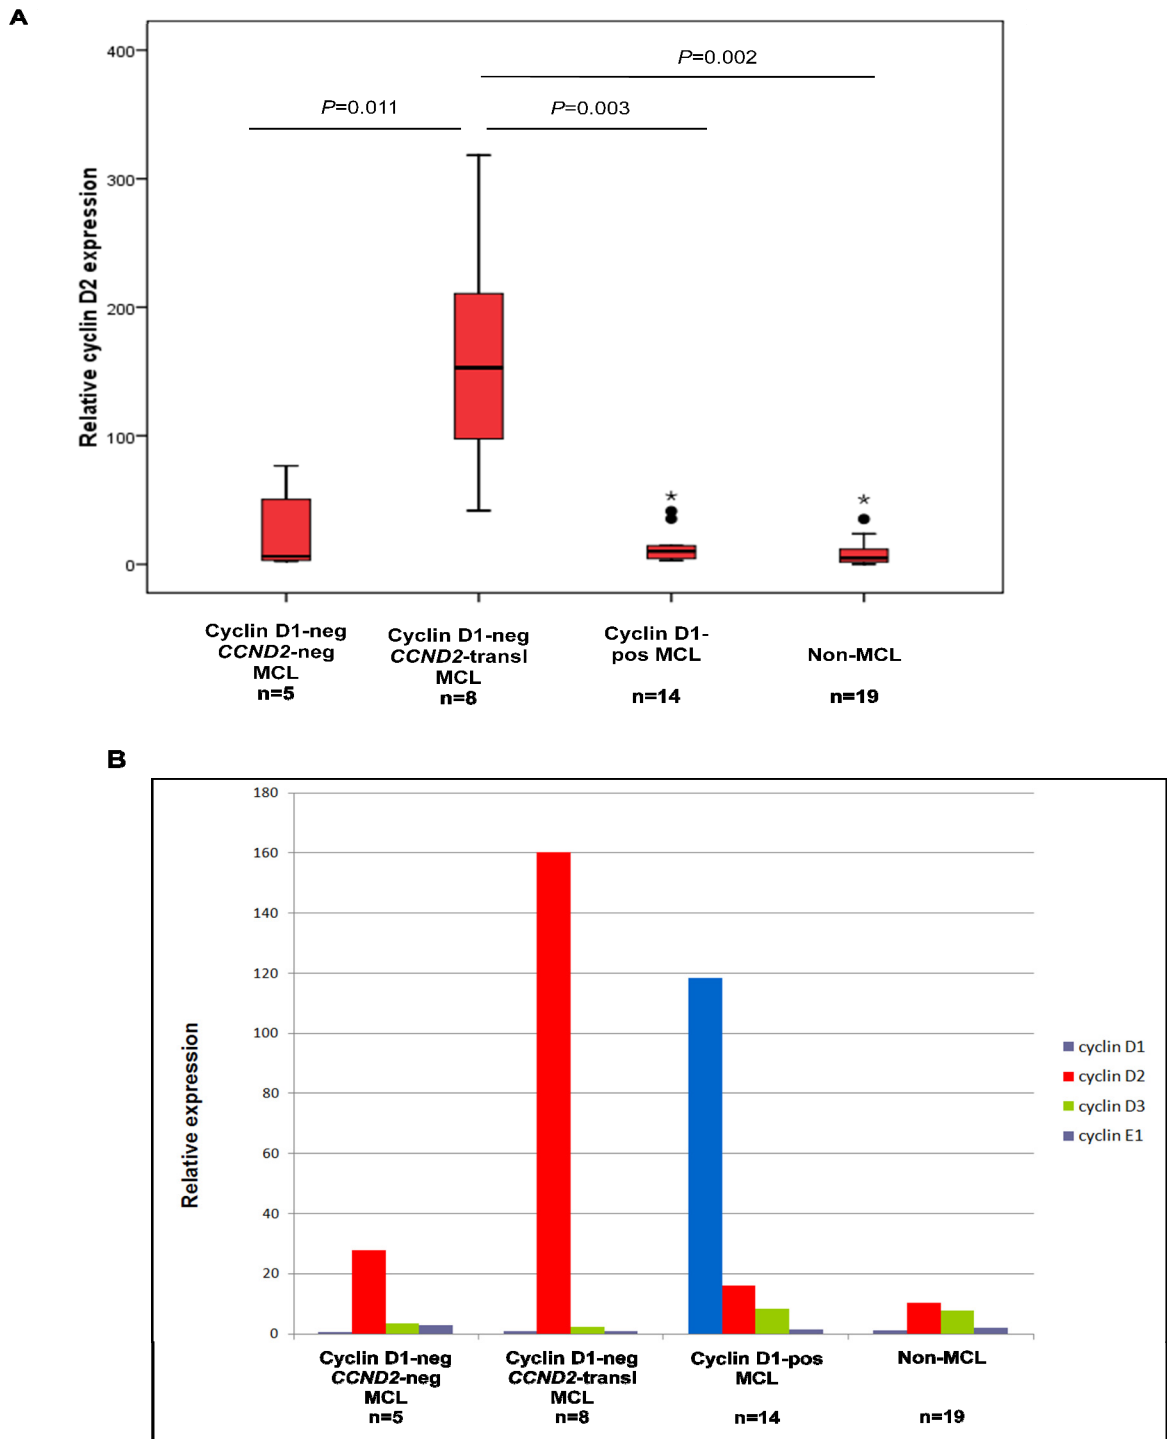

**Supplemental Figure S2. Frequency of genetic alterations in *CCND2*-translocated MCL.** (A) *IGK-CCND2* translocation MCL (n=7) and (B) *IGL-CCND2* translocation MCL (n=4). In the X-axis the chromosomes are represented horizontally from 1 to 22, in the Y-axis is represented the percentage of cases showing the copy number alterations. Gains are represented in the positive Y-axis and colored in blue, whereas losses are represented in the negative Y-axis in red.

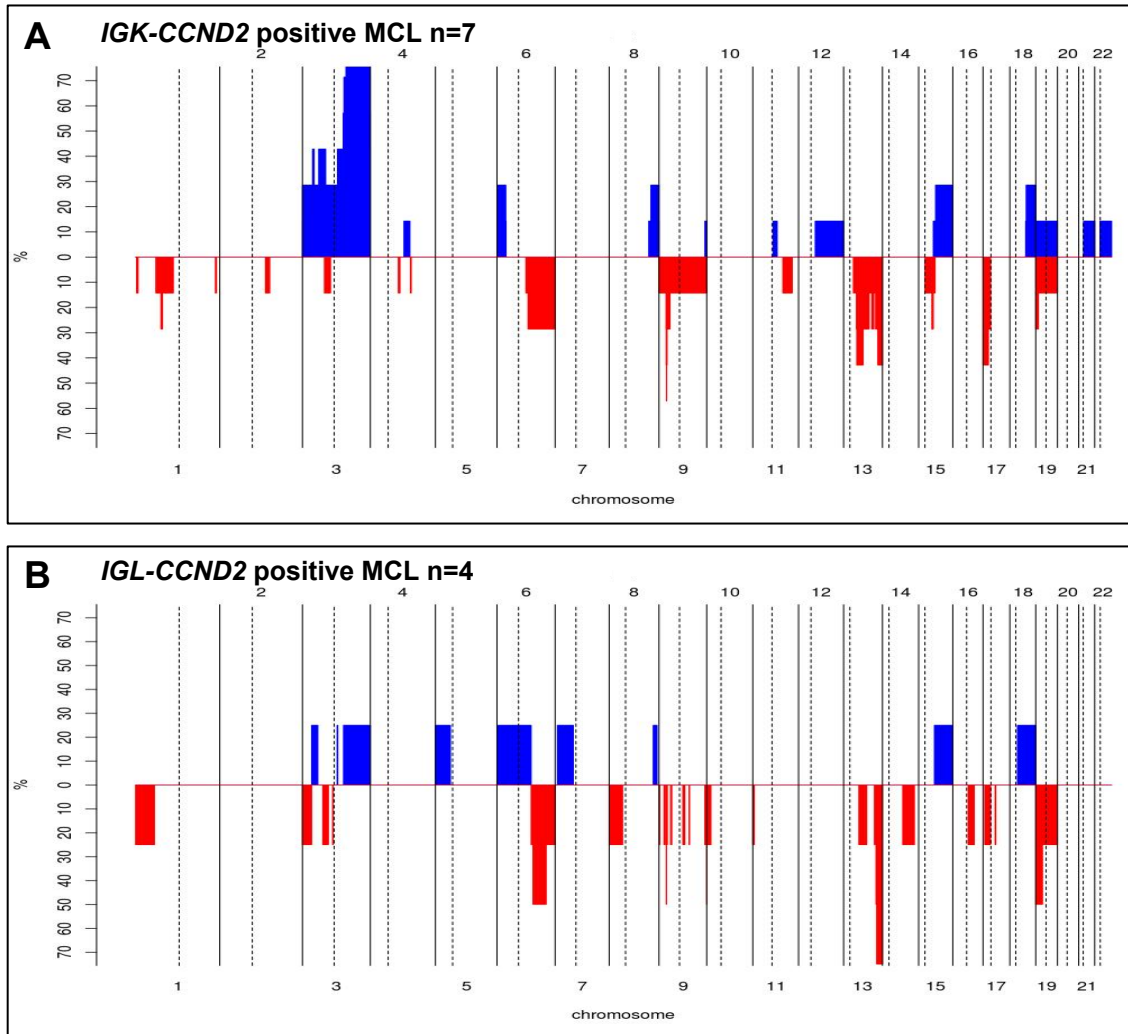

**Supplemental Figure S3. Different patterns of 9p deletions in Cyclin D1-negative MCL. (A)**

Deletions in 9p21.3 with the minimal deleted region in *CDKN2A* gene (each black bar represents one case with deletion (n=15)). **(B)** Different examples of 9p loss in four cases (deletions indicated under red rectangle). The log<sub>2</sub> ratio for heterozygous deletions varied between -0.28 and -0.73, whereas for homozygous deletions was between -0.91 and -3.82. The heterozygous 9p deletions differed in size (2-93 Mb) and comprised a whole monosomy in two cases, whereas the homozygous 9p21 deletions diverged from a focal 68 Kb deletion (comprising the entire *CDKN2A* and part of *CDKN2B* and *MTAP* genes) to 10.3 Mb. Seven cases (47%) had deletions smaller than 2 Mb (6 homozygote and one heterozygote). All deletions spanned the *CDKN2A*, *CDKN2B* and *MTAP* loci. In five cases, 9p had additional deletions, besides the aforementioned 9p21.3 (range 1-4 additional losses/case).

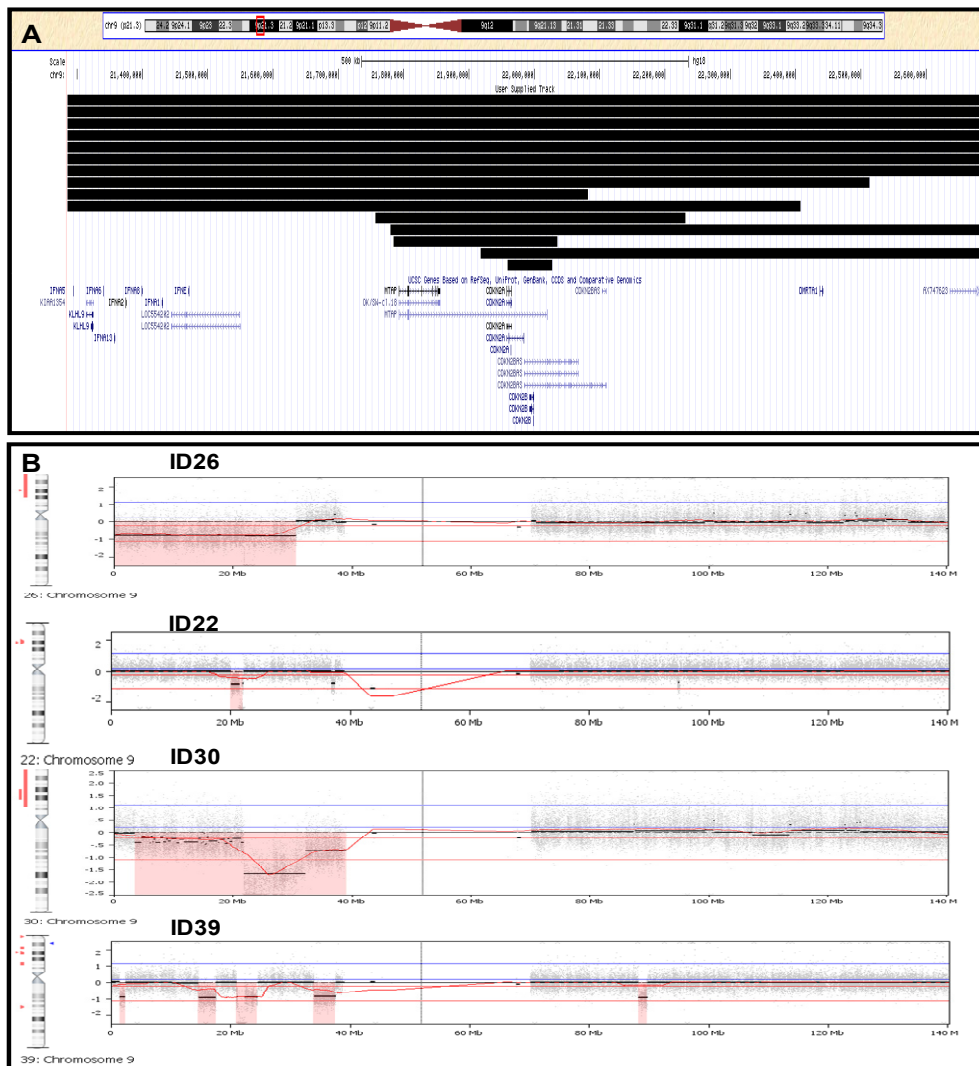



**Supplemental Figure S4. Kaplan-Meier curves of Cyclin D1-negative/SOX11-positive MCL representing (A) whole series (5-year OS 48%, 95% CI, 28.4-67.6); (B) normal and high serum LDH levels; and (C) high ( $\geq 35\%$ ) and low ( $< 35\%$ ) expression of Ki67 proliferation marker. N, number of patients; D, dead patients.**

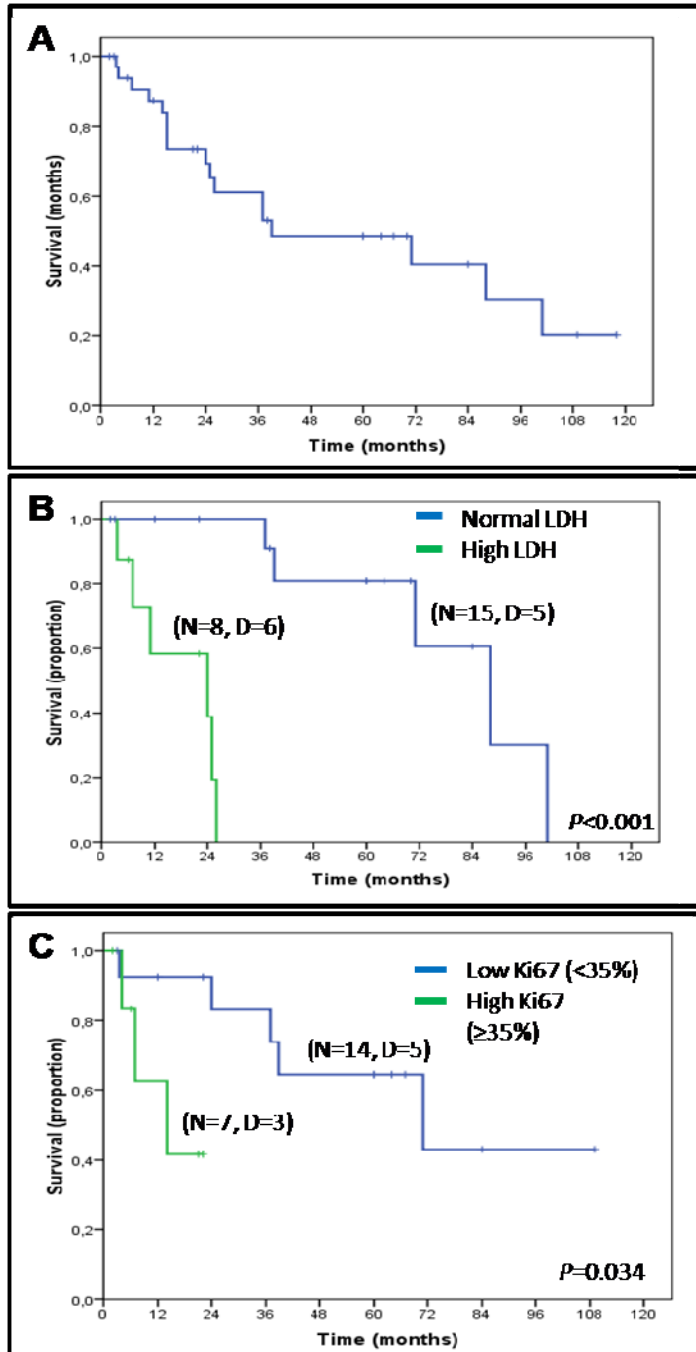

#### IV. Supplemental References

1. Nagel I, Szczepanowski M, Martin-Subero JI et al. Deregulation of the telomerase reverse transcriptase (TERT) gene by chromosomal translocations in B-cell malignancies. *Blood* 2010;116(8):1317-1320.
2. Zettl A, Strobel P, Wagner K et al. Recurrent genetic aberrations in thymoma and thymic carcinoma. *Am.J.Pathol.* 2000;157(1):257-266.
3. van Dongen JJ, Langerak AW, Bruggemann M et al. Design and standardization of PCR primers and protocols for detection of clonal immunoglobulin and T-cell receptor gene recombinations in suspect lymphoproliferations: report of the BIOMED-2 Concerted Action BMH4-CT98-3936. *Leukemia* 2003;17(12):2257-2317.
4. Lepretre F, Villenet C, Quief S et al. Waved aCGH: to smooth or not to smooth. *Nucleic Acids Res.* 2010;38(7):e94.
5. Royo C, Navarro A, Clot G et al. Non-nodal type of mantle cell lymphoma is a specific biological and clinical subgroup of the disease. *Leukemia* 2012; 26(8):1895-1898.
